# Supplementary material
Source: publisher figshare collection journal article supplement (https://acs.figshare.com/ndownloader/files/5678058)
Supplement: Supplementary file 1 [file 5678058]

data_global

_audit_creation_method            SHELXL-97 
 
_publ_contact_author

;
    Prof. Ashwini Nangia
    School of Chemistry
    Univerisity of Hyderabad
    Hyderabad  500 046
    India
;

_publ_contact_author_email        'ansc@uohyd.ernet.in'
_publ_contact_author_phone        '91 40 23011338'
_publ_contact_author_fax          '91 40 23011338'

loop_
_publ_author_name
'Balakrishna R. Bhogala'
'Ashwini Nangia'

#####################

data_1
 
_audit_creation_method            SHELXL-97 

_exptl_crystal_preparation       'Ethanol - Benzene (3:1)' 

_chemical_name_systematic 
; 
 cis,cis-1,3,5-cyclohexanetricarboxylic acid - 1,2-bis(4-pyridyl)ethane
; 
_chemical_melting_point           '470' 
_chemical_formula_moiety          '(C9 H12 O6) 1.5(C12 H12 N2)'
_chemical_formula_sum 
 'C27 H30 N3 O6' 
_chemical_formula_weight          492.54 
 
loop_ 
 _atom_type_symbol 
 _atom_type_description 
 _atom_type_scat_dispersion_real 
 _atom_type_scat_dispersion_imag 
 _atom_type_scat_source 
 'C'  'C'   0.0181   0.0091 
 'International Tables Vol C Tables 4.2.6.8 and 6.1.1.4' 
 'H'  'H'   0.0000   0.0000 
 'International Tables Vol C Tables 4.2.6.8 and 6.1.1.4' 
 'N'  'N'   0.0311   0.0180 
 'International Tables Vol C Tables 4.2.6.8 and 6.1.1.4' 
 'O'  'O'   0.0492   0.0322 
 'International Tables Vol C Tables 4.2.6.8 and 6.1.1.4' 
 
_symmetry_cell_setting            Monoclinic
_symmetry_space_group_name_H-M    'P 21 /c' 
 
loop_ 
 _symmetry_equiv_pos_as_xyz 
 'x, y, z' 
 '-x, y+1/2, -z+1/2' 
 '-x, -y, -z' 
 'x, -y-1/2, z-1/2' 
 
_cell_length_a                    11.00670(10) 
_cell_length_b                    11.84850(10) 
_cell_length_c                    19.9299(2) 
_cell_angle_alpha                 90.00 
_cell_angle_beta                  94.4440(10) 
_cell_angle_gamma                 90.00 
_cell_volume                      2591.30(4) 
_cell_formula_units_Z             4 
_cell_measurement_temperature     293(2) 
_cell_measurement_reflns_used     5442
_cell_measurement_theta_min       4.0235
_cell_measurement_theta_max       66.8375
 
_exptl_crystal_description        cubic
_exptl_crystal_colour             'colourless'
_exptl_crystal_size_max           0.14
_exptl_crystal_size_mid           0.12
_exptl_crystal_size_min           0.09
_exptl_crystal_density_meas  ?
_exptl_crystal_density_diffrn     1.263 
_exptl_crystal_density_method     'not measured' 
_exptl_crystal_F_000              1044 
_exptl_absorpt_coefficient_mu     0.739 
_exptl_absorpt_correction_type    'multi-scan'
_exptl_absorpt_process_details
'Bruker (2000), SADABS v2.01, Bruker AXS Inc., Madison, WI, USA'
_exptl_absorpt_correction_T_min   0.821
_exptl_absorpt_correction_T_max   0.934
_diffrn_ambient_temperature       293(2) 
_diffrn_radiation_wavelength      1.54178 
_diffrn_radiation_type            CuK\a 
_diffrn_radiation_source          'rotating anode' 
_diffrn_radiation_monochromator   'gobel optics' 
_diffrn_measurement_device_type   'Bruker SMART 6000 CCD'
_diffrn_measurement_method        ' \w scans' 
_diffrn_standards_decay_%         '1' 
_diffrn_reflns_number             13453 
_diffrn_reflns_av_R_equivalents   0.0316 
_diffrn_reflns_av_sigmaI/netI     0.0274 
_diffrn_reflns_limit_h_min        -12 
_diffrn_reflns_limit_h_max        12 
_diffrn_reflns_limit_k_min        -13 
_diffrn_reflns_limit_k_max        13 
_diffrn_reflns_limit_l_min        -21 
_diffrn_reflns_limit_l_max        23 
_diffrn_reflns_theta_min          4.03 
_diffrn_reflns_theta_max          67.06 
_reflns_number_total              4415 
_reflns_number_gt                 3184 
_reflns_threshold_expression      >2sigma(I) 
 
_computing_data_collection        'Bruker SMART v5.059 (Bruker, 1999)' 
_computing_cell_refinement        'Bruker SMART v5.059 (Bruker, 1999)' 
_computing_data_reduction         'Bruker SAINT v6.02A (Bruker, 2000)' 
_computing_structure_solution     'SHELXS-97 (Sheldrick, 1990)' 
_computing_structure_refinement   'SHELXL-97 (Sheldrick, 1997)' 
_computing_molecular_graphics     'PLUTON (Spek, 1992)' 
_computing_publication_material   'SHELXL-97 (Sheldrick, 1997)' 
 
_refine_special_details 
; 
 Refinement of F^2^ against ALL reflections.  The weighted R-factor wR and 
 goodness of fit S are based on F^2^, conventional R-factors R are based 
 on F, with F set to zero for negative F^2^. The threshold expression of 
 F^2^ > 2sigma(F^2^) is used only for calculating R-factors(gt) etc. and is 
 not relevant to the choice of reflections for refinement.  R-factors based 
 on F^2^ are statistically about twice as large as those based on F, and R- 
 factors based on ALL data will be even larger. 
; 
 
_refine_ls_structure_factor_coef  Fsqd  
_refine_ls_matrix_type            full 
_refine_ls_weighting_scheme       calc  
_refine_ls_weighting_details 
 'calc w=1/[\s^2^(Fo^2^)+(0.1714P)^2^+0.3725P] where P=(Fo^2^+2Fc^2^)/3' 
_atom_sites_solution_primary      direct 
_atom_sites_solution_secondary    difmap 
_atom_sites_solution_hydrogens    geom 
_refine_ls_hydrogen_treatment     mixed 
_refine_ls_extinction_method      none 
_refine_ls_number_reflns          4415 
_refine_ls_number_parameters      325 
_refine_ls_number_restraints      0 
_refine_ls_R_factor_all           0.1023 
_refine_ls_R_factor_gt            0.0866 
_refine_ls_wR_factor_ref          0.2753 
_refine_ls_wR_factor_gt           0.2522 
_refine_ls_goodness_of_fit_ref    1.095 
_refine_ls_restrained_S_all       1.095 
_refine_ls_shift/su_max           0.000 
_refine_ls_shift/su_mean          0.000 
 
loop_ 
 _atom_site_label 
 _atom_site_type_symbol 
 _atom_site_fract_x 
 _atom_site_fract_y 
 _atom_site_fract_z 
 _atom_site_U_iso_or_equiv 
 _atom_site_adp_type 
 _atom_site_occupancy 
 _atom_site_symmetry_multiplicity
 _atom_site_calc_flag 
 _atom_site_refinement_flags 
 _atom_site_disorder_assembly 
 _atom_site_disorder_group 
O30 O 0.4182(2) 0.9144(2) 0.13986(11) 0.0945(7) Uani 1 1 d . . . 
H30A H 0.4472 0.9260 0.1784 0.142 Uiso 1 1 calc R . . 
O34 O -0.0036(2) 0.85007(19) -0.09520(13) 0.0971(8) Uani 1 1 d . . . 
H34A H -0.0568 0.8017 -0.0943 0.146 Uiso 1 1 calc R . . 
C22 C 0.3474(3) 0.9991(2) 0.03690(13) 0.0673(7) Uani 1 1 d . . . 
H22A H 0.4085 0.9620 0.0112 0.081 Uiso 1 1 calc R . . 
C26 C 0.2689(3) 1.1063(2) -0.06677(13) 0.0663(7) Uani 1 1 d . . . 
H26A H 0.3305 1.0722 -0.0934 0.080 Uiso 1 1 calc R . . 
N19 N 0.1243(3) 2.1589(2) -0.38034(17) 0.0896(8) Uani 1 1 d . . . 
C23 C 0.2333(3) 0.9262(2) 0.03137(13) 0.0685(7) Uani 1 1 d . . . 
H23A H 0.1721 0.9595 0.0578 0.082 Uiso 1 1 calc R . . 
H23B H 0.2527 0.8518 0.0495 0.082 Uiso 1 1 calc R . . 
C27 C 0.3219(3) 1.1147(2) 0.00561(14) 0.0686(7) Uani 1 1 d . . . 
H27A H 0.2653 1.1551 0.0318 0.082 Uiso 1 1 calc R . . 
H27B H 0.3972 1.1576 0.0071 0.082 Uiso 1 1 calc R . . 
N8 N 0.1710(3) 1.4399(2) -0.20190(18) 0.0915(8) Uani 1 1 d . . . 
C24 C 0.1823(3) 0.9153(2) -0.04175(13) 0.0657(7) Uani 1 1 d . . . 
H24A H 0.2470 0.8818 -0.0664 0.079 Uiso 1 1 calc R . . 
O36 O 0.2111(3) 1.2248(2) -0.15826(12) 0.1205(11) Uani 1 1 d . . . 
H36A H 0.1964 1.2897 -0.1706 0.181 Uiso 1 1 calc R . . 
C30 C 0.2396(3) 1.2239(3) -0.09516(17) 0.0835(9) Uani 1 1 d . . . 
C21 C 0.1862(4) 2.0345(3) -0.29465(19) 0.0914(10) Uani 1 1 d . . . 
H21A H 0.2096 2.0255 -0.2491 0.110 Uiso 1 1 calc R . . 
C28 C 0.4004(3) 1.0098(3) 0.10886(16) 0.0806(8) Uani 1 1 d . . . 
C16 C 0.1799(3) 1.9415(2) -0.33544(17) 0.0797(8) Uani 1 1 d . . . 
C25 C 0.1556(3) 1.0308(2) -0.07287(13) 0.0678(7) Uani 1 1 d . . . 
H25A H 0.0907 1.0667 -0.0504 0.081 Uiso 1 1 calc R . . 
H25B H 0.1281 1.0219 -0.1200 0.081 Uiso 1 1 calc R . . 
O33 O 0.0716(4) 0.7541(3) -0.01045(17) 0.1526(16) Uani 1 1 d . . . 
O35 O 0.2490(3) 1.3084(2) -0.06214(14) 0.1204(10) Uani 1 1 d . . . 
C11 C 0.1418(3) 1.6591(2) -0.24439(18) 0.0814(9) Uani 1 1 d . . . 
C20 C 0.1594(4) 2.1393(3) -0.3186(2) 0.0940(10) Uani 1 1 d . . . 
H20A H 0.1668 2.1998 -0.2888 0.113 Uiso 1 1 calc R . . 
C17 C 0.1437(4) 1.9609(3) -0.4025(2) 0.0961(10) Uani 1 1 d . . . 
H17A H 0.1374 1.9021 -0.4335 0.115 Uiso 1 1 calc R . . 
C29 C 0.0775(3) 0.8333(3) -0.04709(16) 0.0847(9) Uani 1 1 d . . . 
C13 C 0.1888(3) 1.5192(4) -0.15697(17) 0.0970(11) Uani 1 1 d . . . 
H13A H 0.2097 1.5004 -0.1123 0.116 Uiso 1 1 calc R . . 
C10 C 0.1276(4) 1.5691(3) -0.28527(19) 0.0920(10) Uani 1 1 d . . . 
H10A H 0.1067 1.5808 -0.3308 0.110 Uiso 1 1 calc R . . 
C18 C 0.1157(3) 2.0766(4) -0.42258(18) 0.0963(11) Uani 1 1 d . . . 
H18A H 0.0908 2.0915 -0.4674 0.116 Uiso 1 1 calc R . . 
C9 C 0.1423(4) 1.4656(3) -0.2632(2) 0.0994(11) Uani 1 1 d . . . 
H9A H 0.1310 1.4071 -0.2942 0.119 Uiso 1 1 calc R . . 
C12 C 0.1761(4) 1.6375(3) -0.1766(2) 0.0981(11) Uani 1 1 d . . . 
H12A H 0.1901 1.6956 -0.1456 0.118 Uiso 1 1 calc R . . 
O31 O 0.4233(5) 1.0968(3) 0.13549(16) 0.174(2) Uani 1 1 d . . . 
C15 C 0.2120(5) 1.8256(3) -0.3065(3) 0.1169(15) Uani 1 1 d . . . 
H15A H 0.2294 1.7753 -0.3429 0.140 Uiso 1 1 calc R . . 
H15B H 0.2853 1.8317 -0.2764 0.140 Uiso 1 1 calc R . . 
C14 C 0.1171(5) 1.7776(3) -0.2705(3) 0.137(2) Uani 1 1 d . . . 
H14A H 0.0426 1.7766 -0.2999 0.164 Uiso 1 1 calc R . . 
H14B H 0.1034 1.8262 -0.2327 0.164 Uiso 1 1 calc R . . 
C4 C 0.4675(3) 0.4890(3) 0.09296(15) 0.0794(8) Uani 1 1 d . . . 
N1 N 0.5164(3) 0.4442(3) 0.23003(13) 0.0872(8) Uani 1 1 d . . . 
C3 C 0.4607(4) 0.3814(3) 0.11919(17) 0.0929(10) Uani 1 1 d . . . 
H3A H 0.4389 0.3213 0.0908 0.111 Uiso 1 1 calc R . . 
C6 C 0.5221(3) 0.5476(3) 0.20544(17) 0.0849(9) Uani 1 1 d . . . 
H6A H 0.5434 0.6061 0.2352 0.102 Uiso 1 1 calc R . . 
C5 C 0.4981(3) 0.5742(3) 0.13800(16) 0.0831(9) Uani 1 1 d . . . 
H5A H 0.5027 0.6485 0.1234 0.100 Uiso 1 1 calc R . . 
C2 C 0.4856(4) 0.3628(3) 0.18620(18) 0.0954(10) Uani 1 1 d . . . 
H2A H 0.4808 0.2893 0.2021 0.115 Uiso 1 1 calc R . . 
C7 C 0.4438(3) 0.5110(4) 0.01897(15) 0.0922(10) Uani 1 1 d . . . 
H7A H 0.4185 0.5888 0.0121 0.111 Uiso 1 1 calc R . . 
H7B H 0.3778 0.4629 0.0010 0.111 Uiso 1 1 calc R . . 
 
loop_ 
 _atom_site_aniso_label 
 _atom_site_aniso_U_11 
 _atom_site_aniso_U_22 
 _atom_site_aniso_U_33 
 _atom_site_aniso_U_23 
 _atom_site_aniso_U_13 
 _atom_site_aniso_U_12 
O30 0.1232(19) 0.0852(15) 0.0712(13) 0.0121(11) -0.0167(12) 0.0058(12) 
O34 0.1077(17) 0.0795(15) 0.1009(17) -0.0053(12) -0.0121(14) -0.0263(12) 
C22 0.0793(17) 0.0613(15) 0.0607(15) 0.0049(11) 0.0009(12) -0.0076(12) 
C26 0.0807(17) 0.0560(15) 0.0615(15) 0.0066(11) 0.0013(12) -0.0051(11) 
N19 0.0933(18) 0.0693(17) 0.105(2) 0.0014(15) 0.0002(15) 0.0155(13) 
C23 0.0865(17) 0.0571(15) 0.0611(15) 0.0055(11) 0.0016(13) -0.0097(12) 
C27 0.0822(17) 0.0554(14) 0.0668(16) 0.0017(11) -0.0029(13) -0.0097(12) 
N8 0.0979(19) 0.0679(16) 0.107(2) 0.0078(15) 0.0001(16) -0.0083(13) 
C24 0.0815(17) 0.0552(14) 0.0602(14) -0.0026(11) 0.0050(12) -0.0090(11) 
O36 0.201(3) 0.0727(15) 0.0811(16) 0.0137(11) -0.0322(17) -0.0005(16) 
C30 0.095(2) 0.074(2) 0.080(2) 0.0190(16) -0.0024(16) -0.0105(15) 
C21 0.122(3) 0.0638(18) 0.090(2) 0.0035(15) 0.0164(19) 0.0134(16) 
C28 0.093(2) 0.078(2) 0.0678(17) 0.0083(14) -0.0112(14) -0.0164(15) 
C16 0.098(2) 0.0517(16) 0.091(2) 0.0060(13) 0.0221(17) 0.0059(13) 
C25 0.0808(17) 0.0609(15) 0.0601(14) 0.0015(11) -0.0058(12) -0.0076(12) 
O33 0.192(3) 0.118(2) 0.138(3) 0.056(2) -0.049(2) -0.088(2) 
O35 0.193(3) 0.0579(14) 0.1070(19) 0.0069(13) -0.0099(19) -0.0031(16) 
C11 0.099(2) 0.0579(16) 0.090(2) 0.0142(14) 0.0264(17) 0.0118(13) 
C20 0.117(3) 0.0600(18) 0.105(3) 0.0046(16) 0.011(2) 0.0153(16) 
C17 0.109(3) 0.082(2) 0.097(2) -0.0162(18) 0.013(2) -0.0080(18) 
C29 0.104(2) 0.077(2) 0.0725(18) -0.0134(15) 0.0027(17) -0.0214(16) 
C13 0.086(2) 0.134(3) 0.0696(19) 0.026(2) -0.0013(16) 0.002(2) 
C10 0.113(3) 0.080(2) 0.084(2) 0.0016(16) 0.0139(18) -0.0041(17) 
C18 0.088(2) 0.123(3) 0.076(2) 0.021(2) -0.0055(16) -0.0021(19) 
C9 0.120(3) 0.076(2) 0.101(3) 0.0033(18) 0.001(2) -0.0140(18) 
C12 0.123(3) 0.086(2) 0.086(2) -0.0159(18) 0.017(2) 0.0048(19) 
O31 0.318(5) 0.091(2) 0.097(2) 0.0176(15) -0.091(3) -0.060(3) 
C15 0.143(3) 0.0580(19) 0.157(4) 0.024(2) 0.057(3) 0.0146(19) 
C14 0.160(4) 0.077(3) 0.181(5) 0.047(3) 0.066(4) 0.031(2) 
C4 0.0723(17) 0.101(2) 0.0639(16) -0.0166(15) -0.0009(13) -0.0068(15) 
N1 0.0957(18) 0.094(2) 0.0699(15) -0.0122(13) -0.0071(13) -0.0044(14) 
C3 0.114(3) 0.086(2) 0.077(2) -0.0227(17) -0.0048(18) -0.0178(18) 
C6 0.090(2) 0.088(2) 0.0746(19) -0.0260(16) -0.0083(15) -0.0045(16) 
C5 0.090(2) 0.083(2) 0.0750(19) -0.0125(15) -0.0009(15) -0.0087(15) 
C2 0.121(3) 0.081(2) 0.083(2) -0.0073(16) -0.0015(19) -0.0109(18) 
C7 0.088(2) 0.122(3) 0.0646(17) -0.0108(17) -0.0037(14) -0.0076(18) 
 
_geom_special_details 
; 
 All esds (except the esd in the dihedral angle between two l.s. planes) 
 are estimated using the full covariance matrix.  The cell esds are taken 
 into account individually in the estimation of esds in distances, angles 
 and torsion angles; correlations between esds in cell parameters are only 
 used when they are defined by crystal symmetry.  An approximate (isotropic) 
 treatment of cell esds is used for estimating esds involving l.s. planes. 
; 
 
loop_ 
 _geom_bond_atom_site_label_1 
 _geom_bond_atom_site_label_2 
 _geom_bond_distance 
 _geom_bond_site_symmetry_2 
 _geom_bond_publ_flag 
O30 C28 1.296(4) . ? 
O34 C29 1.274(4) . ? 
C22 C28 1.511(4) . ? 
C22 C27 1.521(4) . ? 
C22 C23 1.522(4) . ? 
C26 C27 1.517(4) . ? 
C26 C30 1.529(4) . ? 
C26 C25 1.531(4) . ? 
N19 C20 1.282(5) . ? 
N19 C18 1.288(5) . ? 
C23 C24 1.526(4) . ? 
N8 C9 1.276(5) . ? 
N8 C13 1.302(5) . ? 
C24 C29 1.506(4) . ? 
C24 C25 1.522(4) . ? 
O36 C30 1.272(4) . ? 
C30 O35 1.198(4) . ? 
C21 C20 1.354(5) . ? 
C21 C16 1.367(5) . ? 
C28 O31 1.179(4) . ? 
C16 C17 1.383(5) . ? 
C16 C15 1.520(4) . ? 
O33 C29 1.194(4) . ? 
C11 C10 1.344(5) . ? 
C11 C12 1.398(5) . ? 
C11 C14 1.514(4) . ? 
C17 C18 1.455(6) . ? 
C13 C12 1.460(5) . ? 
C10 C9 1.309(5) . ? 
C15 C14 1.430(6) . ? 
C4 C5 1.375(4) . ? 
C4 C3 1.382(5) . ? 
C4 C7 1.500(4) . ? 
N1 C6 1.323(5) . ? 
N1 C2 1.328(4) . ? 
C3 C2 1.360(5) . ? 
C6 C5 1.386(5) . ? 
C7 C7 1.521(7) 3_665 ? 
 
loop_ 
 _geom_angle_atom_site_label_1 
 _geom_angle_atom_site_label_2 
 _geom_angle_atom_site_label_3 
 _geom_angle 
 _geom_angle_site_symmetry_1 
 _geom_angle_site_symmetry_3 
 _geom_angle_publ_flag 
C28 C22 C27 111.1(2) . . ? 
C28 C22 C23 111.8(2) . . ? 
C27 C22 C23 110.9(2) . . ? 
C27 C26 C30 110.3(2) . . ? 
C27 C26 C25 111.4(2) . . ? 
C30 C26 C25 110.8(2) . . ? 
C20 N19 C18 119.4(3) . . ? 
C22 C23 C24 110.9(2) . . ? 
C26 C27 C22 112.1(2) . . ? 
C9 N8 C13 120.0(3) . . ? 
C29 C24 C25 115.4(3) . . ? 
C29 C24 C23 110.2(2) . . ? 
C25 C24 C23 111.0(2) . . ? 
O35 C30 O36 122.7(3) . . ? 
O35 C30 C26 123.5(3) . . ? 
O36 C30 C26 113.7(3) . . ? 
C20 C21 C16 122.0(4) . . ? 
O31 C28 O30 122.0(3) . . ? 
O31 C28 C22 123.6(3) . . ? 
O30 C28 C22 114.4(3) . . ? 
C21 C16 C17 116.0(3) . . ? 
C21 C16 C15 120.2(4) . . ? 
C17 C16 C15 123.9(3) . . ? 
C24 C25 C26 111.2(2) . . ? 
C10 C11 C12 116.8(3) . . ? 
C10 C11 C14 121.2(4) . . ? 
C12 C11 C14 122.0(4) . . ? 
N19 C20 C21 123.1(3) . . ? 
C16 C17 C18 117.5(3) . . ? 
O33 C29 O34 121.0(3) . . ? 
O33 C29 C24 122.8(3) . . ? 
O34 C29 C24 116.2(3) . . ? 
N8 C13 C12 120.1(3) . . ? 
C9 C10 C11 122.3(4) . . ? 
N19 C18 C17 122.1(3) . . ? 
N8 C9 C10 124.1(4) . . ? 
C11 C12 C13 116.6(3) . . ? 
C14 C15 C16 113.1(4) . . ? 
C15 C14 C11 115.0(4) . . ? 
C5 C4 C3 116.6(3) . . ? 
C5 C4 C7 122.0(3) . . ? 
C3 C4 C7 121.4(3) . . ? 
C6 N1 C2 116.5(3) . . ? 
C2 C3 C4 120.5(3) . . ? 
N1 C6 C5 124.0(3) . . ? 
C4 C5 C6 119.0(3) . . ? 
N1 C2 C3 123.4(3) . . ? 
C4 C7 C7 111.9(4) . 3_665 ? 
 
_diffrn_measured_fraction_theta_max    0.956 
_diffrn_reflns_theta_full              67.06 
_diffrn_measured_fraction_theta_full   0.956 
_refine_diff_density_max    0.333 
_refine_diff_density_min   -0.393 
_refine_diff_density_rms    0.102 


#===END
 
data_2

_audit_creation_method            SHELXL-97
_exptl_crystal_preparation       'Ethanol - Benzene (1:1)'

_chemical_name_systematic 
; 
 cis,cis-1,3,5-cyclohexanetricarboxylic 
acid - 1,4-bis(2-(4-pyridyl)ethyl)benzene 
; 
_chemical_melting_point           '483' 
_chemical_formula_moiety          '(C9H12O6)(C20H20N2)'
_chemical_formula_sum 
 'C29 H32 N2 O6' 
_chemical_formula_weight          504.57 
 
loop_ 
 _atom_type_symbol 
 _atom_type_description 
 _atom_type_scat_dispersion_real 
 _atom_type_scat_dispersion_imag 
 _atom_type_scat_source 
 'C'  'C'   0.0033   0.0016 
 'International Tables Vol C Tables 4.2.6.8 and 6.1.1.4' 
 'H'  'H'   0.0000   0.0000 
 'International Tables Vol C Tables 4.2.6.8 and 6.1.1.4' 
 'N'  'N'   0.0061   0.0033 
 'International Tables Vol C Tables 4.2.6.8 and 6.1.1.4' 
 'O'  'O'   0.0106   0.0060 
 'International Tables Vol C Tables 4.2.6.8 and 6.1.1.4' 
 
_symmetry_cell_setting            Orthorhombic 
_symmetry_space_group_name_H-M    'P 212121' 
 
loop_ 
 _symmetry_equiv_pos_as_xyz 
 'x, y, z' 
 '-x+1/2, -y, z+1/2' 
 '-x, y+1/2, -z+1/2' 
 'x+1/2, -y+1/2, -z' 
 
_cell_length_a                    8.2623(6) 
_cell_length_b                    8.2625(7) 
_cell_length_c                    37.064(3) 
_cell_angle_alpha                 90.00 
_cell_angle_beta                  90.00 
_cell_angle_gamma                 90.00 
_cell_volume                      2530.3(3) 
_cell_formula_units_Z             4 
_cell_measurement_temperature     93(2) 
_cell_measurement_reflns_used     9998 
_cell_measurement_theta_min       2.525
_cell_measurement_theta_max       29.196 
 
_exptl_crystal_description        plates 
_exptl_crystal_colour             'colourless' 
_exptl_crystal_size_max           0.38 
_exptl_crystal_size_mid           0.25 
_exptl_crystal_size_min           0.10
_exptl_crystal_density_meas  ?
_exptl_crystal_density_diffrn     1.325 
_exptl_crystal_density_method     'not measured' 
_exptl_crystal_F_000              1072 
_exptl_absorpt_coefficient_mu     0.093 
_exptl_absorpt_correction_type    'multi-scan'
_exptl_absorpt_process_details
'Bruker (2000), SADABS v2.01, Bruker AXS Inc., Madison, WI, USA'
_exptl_absorpt_correction_T_min   0.859
_exptl_absorpt_correction_T_max   0.990
_diffrn_ambient_temperature       93(2) 
_diffrn_radiation_wavelength      0.71073 
_diffrn_radiation_type            MoK\a 
_diffrn_radiation_source          'sealed tube' 
_diffrn_radiation_monochromator   graphite 
_diffrn_measurement_device_type   'Bruker SMART 1000 CCD' 
_diffrn_measurement_method        '\f and \w scans' 
_diffrn_standards_decay_%          '1'
_diffrn_reflns_number             19864 
_diffrn_reflns_av_R_equivalents   0.0429 
_diffrn_reflns_av_sigmaI/netI     0.0481 
_diffrn_reflns_limit_h_min        -11 
_diffrn_reflns_limit_h_max        10 
_diffrn_reflns_limit_k_min        -11 
_diffrn_reflns_limit_k_max        11 
_diffrn_reflns_limit_l_min        -47 
_diffrn_reflns_limit_l_max        50 
_diffrn_reflns_theta_min          1.10 
_diffrn_reflns_theta_max          29.19 
_reflns_number_total              6445 
_reflns_number_gt                 5796 
_reflns_threshold_expression      >2sigma(I) 
 
_computing_data_collection        'Bruker SMART v5.059 (Bruker, 1999)'
 _computing_cell_refinement       'Bruker SMART v5.059 (Bruker, 1999)'  
_computing_data_reduction         'Bruker SAINT v6.02A (Bruker, 2000)' 
_computing_structure_solution     'SHELXS-97 (Sheldrick, 1990)' 
_computing_structure_refinement   'SHELXL-97 (Sheldrick, 1997)' 
_computing_molecular_graphics     'ORTEPII (Johnson 1976), PLATON (Spek1992)'
 
_computing_publication_material   'SHELXL-97 (Sheldrick, 1997)' 
 
_refine_special_details 
; 
 Refinement of F^2^ against ALL reflections.  The weighted R-factor wR and 
 goodness of fit S are based on F^2^, conventional R-factors R are based 
 on F, with F set to zero for negative F^2^. The threshold expression of 
 F^2^ > 2sigma(F^2^) is used only for calculating R-factors(gt) etc. and is 
 not relevant to the choice of reflections for refinement.  R-factors based 
 on F^2^ are statistically about twice as large as those based on F, and R- 
 factors based on ALL data will be even larger. 
; 
 
_refine_ls_structure_factor_coef  Fsqd  
_refine_ls_matrix_type            full 
_refine_ls_weighting_scheme       calc  
_refine_ls_weighting_details 
 'calc w=1/[\s^2^(Fo^2^)+(0.0442P)^2^+0.7853P] where P=(Fo^2^+2Fc^2^)/3' 
_atom_sites_solution_primary      direct 
_atom_sites_solution_secondary    difmap 
_atom_sites_solution_hydrogens    geom 
_refine_ls_hydrogen_treatment     mixed 
_refine_ls_extinction_method      none 
_refine_ls_number_reflns          6445 
_refine_ls_number_parameters      346 
_refine_ls_number_restraints      0 
_refine_ls_R_factor_all           0.0585 
_refine_ls_R_factor_gt            0.0503 
_refine_ls_wR_factor_ref          0.1148 
_refine_ls_wR_factor_gt           0.1073 
_refine_ls_goodness_of_fit_ref    1.162 
_refine_ls_restrained_S_all       1.162 
_refine_ls_shift/su_max           0.000 
_refine_ls_shift/su_mean          0.000 
 
loop_ 
 _atom_site_label 
 _atom_site_type_symbol 
 _atom_site_fract_x 
 _atom_site_fract_y 
 _atom_site_fract_z 
 _atom_site_U_iso_or_equiv 
 _atom_site_adp_type 
 _atom_site_occupancy 
_atom_site_symmetry_multiplicity
 _atom_site_calc_flag 
 _atom_site_refinement_flags 
 _atom_site_disorder_assembly 
 _atom_site_disorder_group 
O33 O 0.37306(18) 0.70423(18) 0.02564(4) 0.0188(3) Uani 1 1 d . . . 
N20 N 2.0451(2) 0.5932(2) 0.47717(5) 0.0226(4) Uani 1 1 d . . . 
O35 O 0.26273(19) 0.65150(19) 0.18224(4) 0.0229(3) Uani 1 1 d . . . 
O37 O -0.3757(2) 0.79030(18) 0.06358(4) 0.0232(3) Uani 1 1 d . . . 
O32 O 0.2073(2) 0.49611(19) 0.01616(4) 0.0234(3) Uani 1 1 d . . . 
C17 C 1.7560(3) 0.6336(2) 0.43826(5) 0.0164(4) Uani 1 1 d . . . 
O34 O 0.1442(2) 0.41395(18) 0.17019(4) 0.0243(4) Uani 1 1 d . . . 
O36 O -0.38701(19) 0.54115(19) 0.08757(4) 0.0255(4) Uani 1 1 d . . . 
C28 C 0.0963(2) 0.6416(2) 0.13092(5) 0.0133(4) Uani 1 1 d . . . 
H28A H 0.1048 0.7586 0.1348 0.016 Uiso 1 1 calc R . . 
C30 C -0.1385(2) 0.6933(2) 0.09066(5) 0.0148(4) Uani 1 1 d . . . 
H30A H -0.1225 0.8091 0.0951 0.018 Uiso 1 1 calc R . . 
C14 C 1.1802(3) 0.6563(3) 0.34386(5) 0.0166(4) Uani 1 1 d . . . 
H14A H 1.0980 0.7327 0.3458 0.020 Uiso 1 1 calc R . . 
C25 C -0.3137(2) 0.6653(3) 0.08150(5) 0.0171(4) Uani 1 1 d . . . 
C16 C 1.5984(3) 0.6479(3) 0.41768(5) 0.0176(4) Uani 1 1 d . . . 
H16A H 1.5623 0.7596 0.4184 0.021 Uiso 1 1 calc R . . 
H16B H 1.5169 0.5824 0.4296 0.021 Uiso 1 1 calc R . . 
C3 C 0.7808(3) 0.4957(3) 0.22057(5) 0.0178(4) Uani 1 1 d . . . 
H3A H 0.8653 0.4467 0.2081 0.021 Uiso 1 1 calc R . . 
C21 C 1.9006(3) 0.5774(3) 0.49311(5) 0.0226(5) Uani 1 1 d . . . 
H21A H 1.8977 0.5531 0.5176 0.027 Uiso 1 1 calc R . . 
C18 C 1.9068(3) 0.6515(3) 0.42193(5) 0.0190(4) Uani 1 1 d . . . 
H18A H 1.9136 0.6773 0.3976 0.023 Uiso 1 1 calc R . . 
C29 C -0.0814(2) 0.5996(2) 0.12386(5) 0.0145(4) Uani 1 1 d . . . 
H29A H -0.0926 0.4842 0.1197 0.017 Uiso 1 1 calc R . . 
H29B H -0.1467 0.6287 0.1446 0.017 Uiso 1 1 calc R . . 
C22 C 1.7554(3) 0.5953(2) 0.47504(5) 0.0182(4) Uani 1 1 d . . . 
H22A H 1.6580 0.5821 0.4872 0.022 Uiso 1 1 calc R . . 
C26 C 0.1404(2) 0.6802(2) 0.06368(5) 0.0137(4) Uani 1 1 d . . . 
H26A H 0.1527 0.7973 0.0669 0.016 Uiso 1 1 calc R . . 
N1 N 0.4971(2) 0.5550(2) 0.22373(5) 0.0186(4) Uani 1 1 d . . . 
C31 C -0.0387(2) 0.6445(3) 0.05739(5) 0.0148(4) Uani 1 1 d . . . 
H31A H -0.0531 0.5300 0.0526 0.018 Uiso 1 1 calc R . . 
H31B H -0.0764 0.7042 0.0365 0.018 Uiso 1 1 calc R . . 
C9 C 1.1556(2) 0.5183(3) 0.32284(5) 0.0158(4) Uani 1 1 d . . . 
C24 C 0.1678(2) 0.5553(3) 0.16346(5) 0.0151(4) Uani 1 1 d . . . 
C2 C 0.6253(3) 0.4903(3) 0.20694(5) 0.0199(4) Uani 1 1 d . . . 
H2A H 0.6087 0.4390 0.1849 0.024 Uiso 1 1 calc R . . 
C27 C 0.2018(2) 0.5963(2) 0.09827(5) 0.0139(4) Uani 1 1 d . . . 
H27A H 0.1997 0.4799 0.0949 0.017 Uiso 1 1 calc R . . 
H27B H 0.3129 0.6283 0.1028 0.017 Uiso 1 1 calc R . . 
C4 C 0.8102(2) 0.5748(2) 0.25301(5) 0.0166(4) Uani 1 1 d . . . 
C13 C 1.3253(3) 0.6814(2) 0.36184(5) 0.0169(4) Uani 1 1 d . . . 
H13A H 1.3387 0.7739 0.3758 0.020 Uiso 1 1 calc R . . 
C10 C 1.2826(3) 0.4094(3) 0.31991(5) 0.0209(4) Uani 1 1 d . . . 
H10A H 1.2701 0.3180 0.3055 0.025 Uiso 1 1 calc R . . 
C7 C 0.9773(3) 0.5896(3) 0.26892(5) 0.0193(4) Uani 1 1 d . . . 
H7A H 0.9995 0.7025 0.2741 0.023 Uiso 1 1 calc R . . 
H7B H 1.0563 0.5529 0.2514 0.023 Uiso 1 1 calc R . . 
C12 C 1.4511(2) 0.5699(3) 0.35928(5) 0.0170(4) Uani 1 1 d . . . 
C11 C 1.4282(3) 0.4332(3) 0.33790(6) 0.0210(4) Uani 1 1 d . . . 
H11A H 1.5108 0.3574 0.3357 0.025 Uiso 1 1 calc R . . 
C23 C 0.2497(2) 0.6282(2) 0.03306(5) 0.0150(4) Uani 1 1 d . . . 
C19 C 2.0464(3) 0.6308(3) 0.44203(6) 0.0217(4) Uani 1 1 d . . . 
H19A H 2.1458 0.6435 0.4306 0.026 Uiso 1 1 calc R . . 
C8 C 0.9963(3) 0.4904(3) 0.30372(5) 0.0190(4) Uani 1 1 d . . . 
H8A H 0.9086 0.5176 0.3200 0.023 Uiso 1 1 calc R . . 
H8B H 0.9868 0.3763 0.2979 0.023 Uiso 1 1 calc R . . 
C6 C 0.5247(3) 0.6290(3) 0.25526(6) 0.0219(4) Uani 1 1 d . . . 
H6A H 0.4371 0.6731 0.2676 0.026 Uiso 1 1 calc R . . 
C5 C 0.6769(3) 0.6434(3) 0.27047(6) 0.0218(4) Uani 1 1 d . . . 
H5A H 0.6905 0.6984 0.2922 0.026 Uiso 1 1 calc R . . 
C15 C 1.6123(3) 0.5944(3) 0.37835(5) 0.0228(5) Uani 1 1 d . . . 
H15A H 1.6741 0.6750 0.3652 0.027 Uiso 1 1 calc R . . 
H15B H 1.6725 0.4937 0.3775 0.027 Uiso 1 1 calc R . . 
H35 H 0.335(4) 0.598(4) 0.1979(9) 0.052(9) Uiso 1 1 d . . . 
H37 H -0.472(4) 0.765(4) 0.0533(8) 0.036(8) Uiso 1 1 d . . . 
H32 H 0.305(5) 0.458(5) 0.0019(11) 0.081(13) Uiso 1 1 d . . . 
 
loop_ 
 _atom_site_aniso_label 
 _atom_site_aniso_U_11 
 _atom_site_aniso_U_22 
 _atom_site_aniso_U_33 
 _atom_site_aniso_U_23 
 _atom_site_aniso_U_13 
 _atom_site_aniso_U_12 
O33 0.0137(7) 0.0272(8) 0.0155(7) 0.0052(6) 0.0015(6) -0.0021(6) 
N20 0.0235(10) 0.0217(9) 0.0227(9) 0.0023(7) -0.0091(8) -0.0019(8) 
O35 0.0235(8) 0.0213(7) 0.0238(8) 0.0005(6) -0.0137(7) 0.0001(7) 
O37 0.0182(8) 0.0221(8) 0.0292(8) 0.0062(6) -0.0095(7) 0.0007(7) 
O32 0.0245(8) 0.0213(8) 0.0245(8) -0.0054(6) 0.0119(6) -0.0028(6) 
C17 0.0206(10) 0.0117(8) 0.0170(9) -0.0009(7) -0.0047(8) 0.0012(8) 
O34 0.0270(9) 0.0207(8) 0.0253(8) 0.0091(6) -0.0102(6) -0.0069(7) 
O36 0.0156(7) 0.0271(8) 0.0339(9) 0.0116(7) -0.0038(7) -0.0037(7) 
C28 0.0127(9) 0.0156(9) 0.0116(8) 0.0006(7) 0.0000(7) -0.0008(8) 
C30 0.0132(9) 0.0175(9) 0.0138(9) 0.0028(7) 0.0000(7) 0.0000(8) 
C14 0.0152(10) 0.0185(10) 0.0161(9) 0.0025(8) -0.0006(7) 0.0034(8) 
C25 0.0138(9) 0.0238(11) 0.0135(9) 0.0003(8) 0.0000(7) 0.0043(8) 
C16 0.0165(10) 0.0195(9) 0.0168(9) -0.0002(8) -0.0025(8) -0.0004(8) 
C3 0.0198(11) 0.0180(9) 0.0156(9) 0.0026(7) -0.0003(8) 0.0034(8) 
C21 0.0297(12) 0.0238(11) 0.0142(9) 0.0023(8) -0.0055(8) 0.0033(10) 
C18 0.0194(11) 0.0210(10) 0.0165(9) 0.0039(8) -0.0033(8) -0.0018(9) 
C29 0.0115(9) 0.0202(10) 0.0119(8) 0.0026(7) 0.0009(7) 0.0008(7) 
C22 0.0231(11) 0.0170(9) 0.0145(9) -0.0004(7) -0.0012(8) 0.0019(8) 
C26 0.0146(9) 0.0130(9) 0.0134(9) 0.0026(7) 0.0019(7) 0.0001(7) 
N1 0.0187(9) 0.0165(8) 0.0204(8) 0.0002(6) -0.0070(7) -0.0004(7) 
C31 0.0143(9) 0.0193(9) 0.0106(8) 0.0030(7) 0.0004(7) 0.0022(8) 
C9 0.0155(9) 0.0216(10) 0.0102(8) 0.0038(7) -0.0021(7) -0.0016(8) 
C24 0.0090(9) 0.0239(10) 0.0125(8) 0.0001(7) 0.0005(7) 0.0019(8) 
C2 0.0262(11) 0.0189(10) 0.0144(9) -0.0031(8) -0.0064(8) 0.0000(9) 
C27 0.0102(9) 0.0174(9) 0.0141(9) 0.0022(7) 0.0008(7) 0.0002(7) 
C4 0.0196(10) 0.0153(9) 0.0148(9) 0.0040(7) -0.0039(8) -0.0033(8) 
C13 0.0222(11) 0.0144(10) 0.0140(9) -0.0024(7) -0.0015(8) 0.0010(8) 
C10 0.0284(12) 0.0174(9) 0.0168(9) -0.0023(8) -0.0042(9) 0.0005(9) 
C7 0.0177(11) 0.0240(11) 0.0163(9) 0.0050(8) -0.0036(8) -0.0021(9) 
C12 0.0147(10) 0.0229(10) 0.0135(9) -0.0004(7) -0.0015(7) 0.0012(8) 
C11 0.0213(11) 0.0207(10) 0.0209(10) -0.0027(8) -0.0030(8) 0.0065(9) 
C23 0.0155(9) 0.0193(9) 0.0102(8) 0.0053(7) 0.0001(7) 0.0025(8) 
C19 0.0189(10) 0.0205(11) 0.0257(10) 0.0023(8) -0.0046(9) -0.0019(9) 
C8 0.0173(10) 0.0226(10) 0.0172(9) 0.0036(8) -0.0050(8) -0.0025(8) 
C6 0.0194(11) 0.0268(11) 0.0197(10) -0.0045(9) -0.0034(9) 0.0054(9) 
C5 0.0222(11) 0.0262(11) 0.0169(9) -0.0056(9) -0.0040(8) -0.0007(9) 
C15 0.0148(10) 0.0351(12) 0.0185(10) -0.0046(9) -0.0043(8) 0.0032(9) 
 
_geom_special_details 
; 
 All esds (except the esd in the dihedral angle between two l.s. planes) 
 are estimated using the full covariance matrix.  The cell esds are taken 
 into account individually in the estimation of esds in distances, angles 
 and torsion angles; correlations between esds in cell parameters are only 
 used when they are defined by crystal symmetry.  An approximate (isotropic) 
 treatment of cell esds is used for estimating esds involving l.s. planes. 
; 
 
loop_ 
 _geom_bond_atom_site_label_1 
 _geom_bond_atom_site_label_2 
 _geom_bond_distance 
 _geom_bond_site_symmetry_2 
 _geom_bond_publ_flag 
O33 C23 1.228(2) . ? 
N20 C21 1.338(3) . ? 
N20 C19 1.339(3) . ? 
O35 C24 1.316(2) . ? 
O37 C25 1.331(2) . ? 
O32 C23 1.306(2) . ? 
C17 C18 1.393(3) . ? 
C17 C22 1.399(3) . ? 
C17 C16 1.514(3) . ? 
O34 C24 1.210(3) . ? 
O36 C25 1.212(3) . ? 
C28 C24 1.520(3) . ? 
C28 C29 1.531(3) . ? 
C28 C27 1.537(3) . ? 
C30 C25 1.504(3) . ? 
C30 C29 1.528(3) . ? 
C30 C31 1.538(3) . ? 
C14 C13 1.387(3) . ? 
C14 C9 1.396(3) . ? 
C16 C15 1.528(3) . ? 
C3 C2 1.382(3) . ? 
C3 C4 1.390(3) . ? 
C21 C22 1.381(3) . ? 
C18 C19 1.384(3) . ? 
C26 C23 1.513(3) . ? 
C26 C31 1.527(3) . ? 
C26 C27 1.543(3) . ? 
N1 C6 1.339(3) . ? 
N1 C2 1.339(3) . ? 
C9 C10 1.387(3) . ? 
C9 C8 1.513(3) . ? 
C4 C5 1.397(3) . ? 
C4 C7 1.506(3) . ? 
C13 C12 1.392(3) . ? 
C10 C11 1.389(3) . ? 
C7 C8 1.536(3) . ? 
C12 C11 1.393(3) . ? 
C12 C15 1.521(3) . ? 
C6 C5 1.383(3) . ? 
 
loop_ 
 _geom_angle_atom_site_label_1 
 _geom_angle_atom_site_label_2 
 _geom_angle_atom_site_label_3 
 _geom_angle 
 _geom_angle_site_symmetry_1 
 _geom_angle_site_symmetry_3 
 _geom_angle_publ_flag 
C21 N20 C19 117.34(19) . . ? 
C18 C17 C22 116.74(19) . . ? 
C18 C17 C16 122.85(17) . . ? 
C22 C17 C16 120.38(19) . . ? 
C24 C28 C29 113.67(16) . . ? 
C24 C28 C27 106.86(15) . . ? 
C29 C28 C27 110.71(15) . . ? 
C25 C30 C29 113.65(16) . . ? 
C25 C30 C31 107.15(16) . . ? 
C29 C30 C31 110.33(16) . . ? 
C13 C14 C9 121.06(19) . . ? 
O36 C25 O37 123.83(19) . . ? 
O36 C25 C30 124.70(19) . . ? 
O37 C25 C30 111.33(18) . . ? 
C17 C16 C15 113.17(17) . . ? 
C2 C3 C4 119.6(2) . . ? 
N20 C21 C22 123.36(19) . . ? 
C19 C18 C17 119.92(18) . . ? 
C30 C29 C28 108.61(16) . . ? 
C21 C22 C17 119.6(2) . . ? 
C23 C26 C31 114.15(16) . . ? 
C23 C26 C27 107.45(15) . . ? 
C31 C26 C27 111.03(16) . . ? 
C6 N1 C2 116.92(18) . . ? 
C26 C31 C30 110.31(16) . . ? 
C10 C9 C14 117.61(18) . . ? 
C10 C9 C8 121.54(18) . . ? 
C14 C9 C8 120.84(18) . . ? 
O34 C24 O35 124.70(19) . . ? 
O34 C24 C28 123.65(18) . . ? 
O35 C24 C28 111.60(17) . . ? 
N1 C2 C3 123.56(19) . . ? 
C28 C27 C26 110.99(16) . . ? 
C3 C4 C5 116.98(19) . . ? 
C3 C4 C7 122.47(19) . . ? 
C5 C4 C7 120.54(18) . . ? 
C14 C13 C12 120.93(18) . . ? 
C9 C10 C11 121.72(19) . . ? 
C4 C7 C8 112.25(17) . . ? 
C13 C12 C11 118.27(19) . . ? 
C13 C12 C15 122.27(19) . . ? 
C11 C12 C15 119.45(19) . . ? 
C10 C11 C12 120.4(2) . . ? 
O33 C23 O32 122.87(18) . . ? 
O33 C23 C26 121.21(18) . . ? 
O32 C23 C26 115.88(17) . . ? 
N20 C19 C18 123.0(2) . . ? 
C9 C8 C7 113.61(17) . . ? 
N1 C6 C5 123.4(2) . . ? 
C6 C5 C4 119.52(19) . . ? 
C12 C15 C16 114.60(18) . . ? 
 
_diffrn_measured_fraction_theta_max    0.977 
_diffrn_reflns_theta_full              29.19 
_diffrn_measured_fraction_theta_full   0.977 
_refine_diff_density_max    0.320 
_refine_diff_density_min   -0.260 
_refine_diff_density_rms    0.060 

#===END

data_3  
 
_audit_creation_method            SHELXL-97 
_exptl_crystal_preparation        'Methanol - Chloroform (1:3)'   

_chemical_name_systematic 
; 
 1,3,5-Cyclohexane tricarboxylate - 1,4-bis(4-pyridinium)ethylene
; 
_chemical_melting_point           '496'
_chemical_formula_moiety          '(C9 H11 O6). 0.5(C12 H12 N2)'
_chemical_formula_sum 
 'C15 H17 N O6' 
_chemical_formula_weight          307.30 
 
loop_ 
 _atom_type_symbol 
 _atom_type_description 
 _atom_type_scat_dispersion_real 
 _atom_type_scat_dispersion_imag 
 _atom_type_scat_source 
 'C'  'C'   0.0033   0.0016 
 'International Tables Vol C Tables 4.2.6.8 and 6.1.1.4' 
 'H'  'H'   0.0000   0.0000 
 'International Tables Vol C Tables 4.2.6.8 and 6.1.1.4' 
 'N'  'N'   0.0061   0.0033 
 'International Tables Vol C Tables 4.2.6.8 and 6.1.1.4' 
 'O'  'O'   0.0106   0.0060 
 'International Tables Vol C Tables 4.2.6.8 and 6.1.1.4' 
 
_symmetry_cell_setting            Monoclinic
_symmetry_space_group_name_H-M    'P 21 /c'
 
loop_ 
 _symmetry_equiv_pos_as_xyz 
 'x, y, z' 
 '-x, y+1/2, -z+1/2' 
 '-x, -y, -z' 
 'x, -y-1/2, z-1/2' 
 
_cell_length_a                    12.430(3) 
_cell_length_b                    5.0616(10) 
_cell_length_c                    22.779(5) 
_cell_angle_alpha                 90.00 
_cell_angle_beta                  90.41(3) 
_cell_angle_gamma                 90.00 
_cell_volume                      1433.1(5) 
_cell_formula_units_Z             4 
_cell_measurement_temperature     293(2) 
_cell_measurement_reflns_used     25
_cell_measurement_theta_min       8 
_cell_measurement_theta_max       17
 
_exptl_crystal_description        Needle
_exptl_crystal_colour             'Light orangered'
_exptl_crystal_size_max           0.42
_exptl_crystal_size_mid           0.33
_exptl_crystal_size_min           0.21
_exptl_crystal_density_meas  ?
_exptl_crystal_density_diffrn     1.424 
_exptl_crystal_density_method     'not measured' 
_exptl_crystal_F_000              648 
_exptl_absorpt_coefficient_mu     0.111 
_exptl_absorpt_correction_type    none
_exptl_special_details 
; 
 ? 
; 
_diffrn_ambient_temperature       293(2) 
_diffrn_radiation_wavelength      0.71073 
_diffrn_radiation_type            MoK\a 
_diffrn_radiation_source          'fine-focus sealed tube' 
_diffrn_radiation_monochromator   graphite 
_diffrn_measurement_device_type   'Enraf Nonius MACH-3'
_diffrn_measurement_method        ' \w scans'
_diffrn_standards_number          3
_diffrn_standards_interval_count  150 
_diffrn_standards_interval_time   90 
_diffrn_standards_decay_%         '1'
_diffrn_reflns_number             3427 
_diffrn_reflns_av_R_equivalents   0.0279 
_diffrn_reflns_av_sigmaI/netI     0.0566 
_diffrn_reflns_limit_h_min        0 
_diffrn_reflns_limit_h_max        16 
_diffrn_reflns_limit_k_min        0 
_diffrn_reflns_limit_k_max        6 
_diffrn_reflns_limit_l_min        -29 
_diffrn_reflns_limit_l_max        29 
_diffrn_reflns_theta_min          1.64 
_diffrn_reflns_theta_max          27.48 
_reflns_number_total              3290 
_reflns_number_gt                 1752 
_reflns_threshold_expression      >2sigma(I) 
 
_computing_data_collection        'CAD4 data collection software'
_computing_cell_refinement        'CAD4 data collection software'
_computing_data_reduction         'XTAL 3.5'
_computing_structure_solution     'SHELXS-97 (Sheldrick, 1990)' 
_computing_structure_refinement   'SHELXL-97 (Sheldrick, 1997)' 
_computing_molecular_graphics     'PLUTON (Spek, 1992)'
_computing_publication_material   'SHELXL-97 (Sheldrick, 1997)'
 
_refine_special_details 
; 
 Refinement of F^2^ against ALL reflections.  The weighted R-factor wR and 
 goodness of fit S are based on F^2^, conventional R-factors R are based 
 on F, with F set to zero for negative F^2^. The threshold expression of 
 F^2^ > 2sigma(F^2^) is used only for calculating R-factors(gt) etc. and is 
 not relevant to the choice of reflections for refinement.  R-factors based 
 on F^2^ are statistically about twice as large as those based on F, and R- 
 factors based on ALL data will be even larger. 
; 
 
_refine_ls_structure_factor_coef  Fsqd  
_refine_ls_matrix_type            full 
_refine_ls_weighting_scheme       calc  
_refine_ls_weighting_details 
 'calc w=1/[\s^2^(Fo^2^)+(0.0508P)^2^+0.1503P] where P=(Fo^2^+2Fc^2^)/3' 
_atom_sites_solution_primary      direct 
_atom_sites_solution_secondary    difmap 
_atom_sites_solution_hydrogens    geom 
_refine_ls_hydrogen_treatment     mixed 
_refine_ls_extinction_method      none 
_refine_ls_number_reflns          3290 
_refine_ls_number_parameters      211 
_refine_ls_number_restraints      0 
_refine_ls_R_factor_all           0.1195 
_refine_ls_R_factor_gt            0.0565 
_refine_ls_wR_factor_ref          0.1411 
_refine_ls_wR_factor_gt           0.1088 
_refine_ls_goodness_of_fit_ref    1.090 
_refine_ls_restrained_S_all       1.090 
_refine_ls_shift/su_max           0.000 
_refine_ls_shift/su_mean          0.000 
 
loop_ 
 _atom_site_label 
 _atom_site_type_symbol 
 _atom_site_fract_x 
 _atom_site_fract_y 
 _atom_site_fract_z 
 _atom_site_U_iso_or_equiv 
 _atom_site_adp_type 
 _atom_site_occupancy 
 _atom_site_symmetry_multiplicity
 _atom_site_calc_flag 
 _atom_site_refinement_flags 
 _atom_site_disorder_assembly 
 _atom_site_disorder_group 
O5 O 0.12065(14) 0.4185(4) 0.29802(7) 0.0460(5) Uani 1 1 d . . . 
O1 O 0.61006(15) 0.3886(4) 0.29119(8) 0.0492(5) Uani 1 1 d . . . 
O4 O 0.36339(16) 0.2172(4) 0.54365(8) 0.0531(6) Uani 1 1 d . . . 
O6 O 0.22279(14) 0.7148(4) 0.25632(8) 0.0532(6) Uani 1 1 d . . . 
C8 C 0.30670(19) 0.1655(6) 0.49539(10) 0.0371(6) Uani 1 1 d . . . 
C2 C 0.44587(19) 0.2368(5) 0.42068(10) 0.0371(6) Uani 1 1 d . . . 
H2A H 0.5006 0.2506 0.4511 0.045 Uiso 1 1 calc R . . 
H2B H 0.4385 0.0517 0.4104 0.045 Uiso 1 1 calc R . . 
O2 O 0.64150(15) 0.1156(4) 0.36488(8) 0.0600(6) Uani 1 1 d . . . 
C1 C 0.48217(18) 0.3908(5) 0.36690(10) 0.0344(6) Uani 1 1 d . . . 
H1A H 0.4972 0.5718 0.3798 0.041 Uiso 1 1 calc R . . 
C9 C 0.20512(19) 0.5527(5) 0.29682(11) 0.0344(6) Uani 1 1 d . . . 
C4 C 0.25206(18) 0.3510(5) 0.39673(10) 0.0356(6) Uani 1 1 d . . . 
H4A H 0.2363 0.1737 0.3830 0.043 Uiso 1 1 calc R . . 
H4B H 0.1865 0.4246 0.4127 0.043 Uiso 1 1 calc R . . 
C3 C 0.33792(18) 0.3384(5) 0.44487(10) 0.0337(6) Uani 1 1 d . . . 
H3A H 0.3493 0.5177 0.4599 0.040 Uiso 1 1 calc R . . 
C5 C 0.28897(18) 0.5199(5) 0.34531(10) 0.0330(6) Uani 1 1 d . . . 
H5A H 0.3054 0.6962 0.3607 0.040 Uiso 1 1 calc R . . 
O3 O 0.24060(17) -0.0088(4) 0.49344(8) 0.0628(6) Uani 1 1 d . . . 
C6 C 0.39301(18) 0.4069(6) 0.32022(10) 0.0385(6) Uani 1 1 d . . . 
H6A H 0.4169 0.5177 0.2881 0.046 Uiso 1 1 calc R . . 
H6B H 0.3792 0.2317 0.3047 0.046 Uiso 1 1 calc R . . 
C7 C 0.58545(19) 0.2823(5) 0.34148(11) 0.0372(6) Uani 1 1 d . . . 
N N 0.07239(18) 0.3499(5) 0.18383(10) 0.0472(6) Uani 1 1 d . . . 
C15 C 0.0397(2) -0.0167(6) 0.01900(11) 0.0421(7) Uani 1 1 d . . . 
H15A H 0.0928 -0.1382 0.0094 0.063 Uiso 1 1 calc R . . 
C14 C -0.0032(2) 0.4400(6) 0.14723(11) 0.0459(7) Uani 1 1 d . . . 
H14A H -0.0479 0.5778 0.1587 0.055 Uiso 1 1 calc R . . 
C12 C 0.05080(19) 0.1223(5) 0.07529(10) 0.0365(6) Uani 1 1 d . . . 
C13 C -0.0151(2) 0.3294(5) 0.09261(11) 0.0414(7) Uani 1 1 d . . . 
H13A H -0.0676 0.3933 0.0670 0.050 Uiso 1 1 calc R . . 
C11 C 0.1301(2) 0.0389(6) 0.11431(12) 0.0484(7) Uani 1 1 d . . . 
H11A H 0.1772 -0.0955 0.1039 0.058 Uiso 1 1 calc R . . 
C10 C 0.1384(2) 0.1562(6) 0.16836(12) 0.0565(8) Uani 1 1 d . . . 
H10A H 0.1911 0.0992 0.1946 0.068 Uiso 1 1 calc R . . 
H17A H 0.678(3) 0.304(7) 0.2723(15) 0.106(13) Uiso 1 1 d . . . 
H16A H 0.353(3) 0.078(8) 0.5728(16) 0.115(15) Uiso 1 1 d . . . 
H18 H 0.087(3) 0.426(7) 0.2291(16) 0.111(13) Uiso 1 1 d . . . 
 
loop_ 
 _atom_site_aniso_label 
 _atom_site_aniso_U_11 
 _atom_site_aniso_U_22 
 _atom_site_aniso_U_33 
 _atom_site_aniso_U_23 
 _atom_site_aniso_U_13 
 _atom_site_aniso_U_12 
O5 0.0377(10) 0.0602(13) 0.0401(10) 0.0077(9) -0.0095(8) -0.0117(10) 
O1 0.0376(10) 0.0651(14) 0.0451(11) 0.0127(11) 0.0069(9) 0.0101(10) 
O4 0.0553(12) 0.0698(15) 0.0339(10) 0.0061(11) -0.0108(9) -0.0092(11) 
O6 0.0330(10) 0.0786(15) 0.0478(11) 0.0295(11) -0.0024(8) -0.0030(10) 
C8 0.0322(13) 0.0485(17) 0.0305(13) -0.0017(12) 0.0003(11) 0.0045(13) 
C2 0.0312(13) 0.0459(16) 0.0341(13) 0.0007(12) -0.0035(10) 0.0033(12) 
O2 0.0420(11) 0.0866(16) 0.0515(12) 0.0247(12) 0.0074(9) 0.0227(12) 
C1 0.0287(12) 0.0403(15) 0.0343(13) -0.0008(12) -0.0025(10) 0.0013(12) 
C9 0.0297(13) 0.0421(16) 0.0316(13) -0.0024(12) 0.0029(11) 0.0049(12) 
C4 0.0275(12) 0.0472(16) 0.0320(13) -0.0003(12) -0.0006(10) 0.0028(12) 
C3 0.0331(13) 0.0383(14) 0.0296(12) -0.0058(11) -0.0012(10) 0.0031(12) 
C5 0.0293(12) 0.0361(14) 0.0334(13) -0.0029(11) -0.0039(10) 0.0018(11) 
O3 0.0632(13) 0.0762(15) 0.0487(12) 0.0135(11) -0.0104(10) -0.0281(13) 
C6 0.0297(12) 0.0527(17) 0.0331(13) 0.0031(13) -0.0045(10) 0.0016(13) 
C7 0.0291(12) 0.0464(16) 0.0361(14) 0.0027(13) -0.0027(11) -0.0004(12) 
N 0.0468(14) 0.0560(16) 0.0385(13) -0.0055(12) -0.0094(11) 0.0042(13) 
C15 0.0392(14) 0.0477(16) 0.0393(15) -0.0047(13) 0.0033(11) 0.0029(14) 
C14 0.0424(15) 0.0493(18) 0.0460(16) -0.0071(14) -0.0054(13) 0.0108(14) 
C12 0.0354(13) 0.0431(15) 0.0310(13) -0.0001(12) 0.0003(11) -0.0031(13) 
C13 0.0407(14) 0.0472(17) 0.0360(14) 0.0002(13) -0.0068(11) 0.0077(13) 
C11 0.0435(15) 0.0550(19) 0.0464(16) -0.0038(15) -0.0074(13) 0.0138(15) 
C10 0.0556(18) 0.065(2) 0.0491(18) -0.0001(16) -0.0197(15) 0.0173(17) 
 
_geom_special_details 
; 
 All esds (except the esd in the dihedral angle between two l.s. planes) 
 are estimated using the full covariance matrix.  The cell esds are taken 
 into account individually in the estimation of esds in distances, angles 
 and torsion angles; correlations between esds in cell parameters are only 
 used when they are defined by crystal symmetry.  An approximate (isotropic) 
 treatment of cell esds is used for estimating esds involving l.s. planes. 
; 
 
loop_ 
 _geom_bond_atom_site_label_1 
 _geom_bond_atom_site_label_2 
 _geom_bond_distance 
 _geom_bond_site_symmetry_2 
 _geom_bond_publ_flag 
O5 C9 1.251(3) . ? 
O1 C7 1.304(3) . ? 
O4 C8 1.328(3) . ? 
O6 C9 1.255(3) . ? 
C8 O3 1.206(3) . ? 
C8 C3 1.499(3) . ? 
C2 C1 1.523(3) . ? 
C2 C3 1.542(3) . ? 
O2 C7 1.215(3) . ? 
C1 C7 1.515(3) . ? 
C1 C6 1.533(3) . ? 
C9 C5 1.522(3) . ? 
C4 C5 1.523(3) . ? 
C4 C3 1.526(3) . ? 
C5 C6 1.528(3) . ? 
N C10 1.328(4) . ? 
N C14 1.333(3) . ? 
C15 C15 1.318(5) 3 ? 
C15 C12 1.468(3) . ? 
C14 C13 1.372(3) . ? 
C12 C11 1.388(3) . ? 
C12 C13 1.389(4) . ? 
C11 C10 1.370(4) . ? 
 
loop_ 
 _geom_angle_atom_site_label_1 
 _geom_angle_atom_site_label_2 
 _geom_angle_atom_site_label_3 
 _geom_angle 
 _geom_angle_site_symmetry_1 
 _geom_angle_site_symmetry_3 
 _geom_angle_publ_flag 
O3 C8 O4 122.1(2) . . ? 
O3 C8 C3 125.4(2) . . ? 
O4 C8 C3 112.4(2) . . ? 
C1 C2 C3 112.3(2) . . ? 
C7 C1 C2 112.3(2) . . ? 
C7 C1 C6 111.4(2) . . ? 
C2 C1 C6 111.6(2) . . ? 
O5 C9 O6 121.5(2) . . ? 
O5 C9 C5 119.7(2) . . ? 
O6 C9 C5 118.8(2) . . ? 
C5 C4 C3 111.29(19) . . ? 
C8 C3 C4 113.1(2) . . ? 
C8 C3 C2 108.07(19) . . ? 
C4 C3 C2 111.28(19) . . ? 
C9 C5 C4 114.2(2) . . ? 
C9 C5 C6 110.26(19) . . ? 
C4 C5 C6 109.7(2) . . ? 
C5 C6 C1 111.7(2) . . ? 
O2 C7 O1 122.3(2) . . ? 
O2 C7 C1 124.7(2) . . ? 
O1 C7 C1 113.0(2) . . ? 
C10 N C14 121.4(2) . . ? 
C15 C15 C12 125.3(3) 3 . ? 
N C14 C13 119.9(3) . . ? 
C11 C12 C13 117.7(2) . . ? 
C11 C12 C15 118.4(2) . . ? 
C13 C12 C15 123.9(2) . . ? 
C14 C13 C12 120.4(2) . . ? 
C10 C11 C12 119.5(3) . . ? 
N C10 C11 121.0(3) . . ? 
 
_diffrn_measured_fraction_theta_max    0.999 
_diffrn_reflns_theta_full              27.48 
_diffrn_measured_fraction_theta_full   0.999 
_refine_diff_density_max    0.190 
_refine_diff_density_min   -0.216 
_refine_diff_density_rms    0.049 

#===END


data_4
 
_audit_creation_method             SHELXL-97
_exptl_crystal_preparation         'Methanol - Chloroform (1:3)'


_chemical_name_systematic
; 
 1,3,5-cyclohexanetricarboxylate - 1,4-bis(2-(4-pyridinium)ethenyl)benzene
; 
_chemical_melting_point           '518 '
_chemical_formula_moiety          '(C9 H11 O6).0.5(C20 H18 N2)'
_chemical_formula_sum 
 'C19 H20 N O6' 
_chemical_formula_weight          358.36 
 
loop_ 
 _atom_type_symbol 
 _atom_type_description 
 _atom_type_scat_dispersion_real 
 _atom_type_scat_dispersion_imag 
 _atom_type_scat_source 
 'C'  'C'   0.0033   0.0016 
 'International Tables Vol C Tables 4.2.6.8 and 6.1.1.4' 
 'H'  'H'   0.0000   0.0000 
 'International Tables Vol C Tables 4.2.6.8 and 6.1.1.4' 
 'N'  'N'   0.0061   0.0033 
 'International Tables Vol C Tables 4.2.6.8 and 6.1.1.4' 
 'O'  'O'   0.0106   0.0060 
 'International Tables Vol C Tables 4.2.6.8 and 6.1.1.4' 
 
_symmetry_cell_setting            Monoclinic 
_symmetry_space_group_name_H-M    'P 21 /c'
 
loop_ 
 _symmetry_equiv_pos_as_xyz 
 'x, y, z' 
 '-x, y+1/2, -z+1/2' 
 '-x, -y, -z' 
 'x, -y-1/2, z-1/2' 
 
_cell_length_a                    4.7854(10) 
_cell_length_b                    14.251(3) 
_cell_length_c                    24.648(5) 
_cell_angle_alpha                 90.00 
_cell_angle_beta                  95.48(3) 
_cell_angle_gamma                 90.00 
_cell_volume                      1673.2(6) 
_cell_formula_units_Z             4 
_cell_measurement_temperature     293(2) 
_cell_measurement_reflns_used     25
_cell_measurement_theta_min       9.12
_cell_measurement_theta_max       18.24
 
_exptl_crystal_description        Cubic
_exptl_crystal_colour             'Orange red'
_exptl_crystal_size_max           0.45
_exptl_crystal_size_mid           0.39
_exptl_crystal_size_min           0.37
_exptl_crystal_density_meas  ?
_exptl_crystal_density_diffrn     1.423 
_exptl_crystal_density_method     'not measured' 
_exptl_crystal_F_000              756 
_exptl_absorpt_coefficient_mu     0.107 
_exptl_absorpt_correction_type    None 
_exptl_special_details 
; 
 ? 
; 
 
_diffrn_ambient_temperature       293(2) 
_diffrn_radiation_wavelength      0.71073 
_diffrn_radiation_type            MoK\a 
_diffrn_radiation_source          'fine-focus sealed tube' 
_diffrn_radiation_monochromator   graphite 
_diffrn_measurement_device_type   'Enraf Nonius MACH-3'
_diffrn_measurement_method        '\w scans'
_diffrn_standards_number          3
_diffrn_standards_interval_count  150 
_diffrn_standards_interval_time   90 
_diffrn_standards_decay_%         '1'
_diffrn_reflns_number             4241 
_diffrn_reflns_av_R_equivalents   0.0256 
_diffrn_reflns_av_sigmaI/netI     0.0736 
_diffrn_reflns_limit_h_min        0 
_diffrn_reflns_limit_h_max        6 
_diffrn_reflns_limit_k_min        0 
_diffrn_reflns_limit_k_max        18 
_diffrn_reflns_limit_l_min        -31 
_diffrn_reflns_limit_l_max        31 
_diffrn_reflns_theta_min          1.65 
_diffrn_reflns_theta_max          27.43 
_reflns_number_total              3804 
_reflns_number_gt                 1861 
_reflns_threshold_expression      >2sigma(I) 
 
_computing_data_collection        'CAD4 data collection software'
_computing_cell_refinement        'CAD4 data collection software'
_computing_data_reduction         'XTAL 3.5'
_computing_structure_solution     'SHELXS-97 (Sheldrick, 1990)' 
_computing_structure_refinement   'SHELXL-97 (Sheldrick, 1997)' 
_computing_molecular_graphics     'PLOTON (Spek, 1992)'
_computing_publication_material   'SHELXL-97 (Sheldrick, 1997)' 
 
_refine_special_details 
; 
 Refinement of F^2^ against ALL reflections.  The weighted R-factor wR and 
 goodness of fit S are based on F^2^, conventional R-factors R are based 
 on F, with F set to zero for negative F^2^. The threshold expression of 
 F^2^ > 2sigma(F^2^) is used only for calculating R-factors(gt) etc. and is 
 not relevant to the choice of reflections for refinement.  R-factors based 
 on F^2^ are statistically about twice as large as those based on F, and R- 
 factors based on ALL data will be even larger. 
; 
 
_refine_ls_structure_factor_coef  Fsqd  
_refine_ls_matrix_type            full 
_refine_ls_weighting_scheme       calc  
_refine_ls_weighting_details 
 'calc w=1/[\s^2^(Fo^2^)+(0.0426P)^2^+0.0000P] where P=(Fo^2^+2Fc^2^)/3' 
_atom_sites_solution_primary      direct 
_atom_sites_solution_secondary    difmap 
_atom_sites_solution_hydrogens    geom 
_refine_ls_hydrogen_treatment     mixed 
_refine_ls_extinction_method      none 
_refine_ls_number_reflns          3804 
_refine_ls_number_parameters      247 
_refine_ls_number_restraints      0 
_refine_ls_R_factor_all           0.1288 
_refine_ls_R_factor_gt            0.0493 
_refine_ls_wR_factor_ref          0.1260 
_refine_ls_wR_factor_gt           0.0925 
_refine_ls_goodness_of_fit_ref    1.061 
_refine_ls_restrained_S_all       1.061 
_refine_ls_shift/su_max           0.000 
_refine_ls_shift/su_mean          0.000 
 
loop_ 
 _atom_site_label 
 _atom_site_type_symbol 
 _atom_site_fract_x 
 _atom_site_fract_y 
 _atom_site_fract_z 
 _atom_site_U_iso_or_equiv 
 _atom_site_adp_type 
 _atom_site_occupancy 
 _atom_site_symmetry_multiplicity
 _atom_site_calc_flag 
 _atom_site_refinement_flags 
 _atom_site_disorder_assembly 
 _atom_site_disorder_group 
O4 O 0.0584(4) 0.78057(12) 0.25708(6) 0.0406(5) Uani 1 1 d . . . 
O5 O 0.1345(4) 0.42051(12) 0.29407(7) 0.0464(5) Uani 1 1 d . . . 
C14 C 0.9887(5) 0.53945(18) 0.10925(9) 0.0326(6) Uani 1 1 d . . . 
H14A H 1.0279 0.4763 0.1159 0.039 Uiso 1 1 calc R . . 
C12 C 1.3134(5) 0.53802(17) 0.03537(9) 0.0279(5) Uani 1 1 d . . . 
O3 O -0.1802(5) 0.84126(14) 0.32188(7) 0.0593(6) Uani 1 1 d . . . 
O2 O 0.2942(5) 0.61658(15) 0.53591(8) 0.0508(6) Uani 1 1 d . . . 
C13 C 1.1167(5) 0.58126(18) 0.07018(9) 0.0317(6) Uani 1 1 d . . . 
H13A H 1.0776 0.6446 0.0643 0.038 Uiso 1 1 calc R . . 
O6 O -0.1118(5) 0.38991(13) 0.36370(7) 0.0533(6) Uani 1 1 d . . . 
C15 C 0.7910(5) 0.58521(17) 0.14250(9) 0.0298(6) Uani 1 1 d . . . 
C1 C 0.2007(6) 0.64972(16) 0.44198(9) 0.0303(6) Uani 1 1 d . . . 
H1A H 0.4054 0.6530 0.4423 0.036 Uiso 1 1 calc R . . 
C9 C 0.0473(6) 0.44065(17) 0.34078(9) 0.0316(6) Uani 1 1 d . . . 
O1 O -0.0731(5) 0.70832(15) 0.51195(7) 0.0606(6) Uani 1 1 d . . . 
N N 0.4148(5) 0.66581(16) 0.20727(8) 0.0369(5) Uani 1 1 d . . . 
C8 C -0.0149(6) 0.78424(17) 0.30663(9) 0.0312(6) Uani 1 1 d . . . 
C11 C 1.4467(5) 0.59499(17) -0.00064(10) 0.0335(6) Uani 1 1 d . . . 
H11A H 1.4113 0.6592 -0.0013 0.050 Uiso 1 1 calc R . . 
C6 C 0.1034(6) 0.55125(16) 0.42270(8) 0.0307(6) Uani 1 1 d . . . 
H6A H 0.2046 0.5044 0.4454 0.037 Uiso 1 1 calc R . . 
H6B H -0.0950 0.5443 0.4269 0.037 Uiso 1 1 calc R . . 
C19 C 0.7158(6) 0.67995(18) 0.13702(10) 0.0377(7) Uani 1 1 d . . . 
H19A H 0.7919 0.7170 0.1111 0.045 Uiso 1 1 calc R . . 
C5 C 0.1528(5) 0.53425(15) 0.36307(9) 0.0277(5) Uani 1 1 d . . . 
H5A H 0.3555 0.5369 0.3603 0.033 Uiso 1 1 calc R . . 
C2 C 0.0709(6) 0.72672(17) 0.40437(9) 0.0341(6) Uani 1 1 d . . . 
H2A H -0.1295 0.7295 0.4075 0.041 Uiso 1 1 calc R . . 
H2B H 0.1511 0.7868 0.4159 0.041 Uiso 1 1 calc R . . 
C7 C 0.1242(6) 0.66314(18) 0.49975(10) 0.0344(6) Uani 1 1 d . . . 
C18 C 0.5300(6) 0.7182(2) 0.16990(10) 0.0402(7) Uani 1 1 d . . . 
H18A H 0.4830 0.7814 0.1663 0.048 Uiso 1 1 calc R . . 
C3 C 0.1210(5) 0.70961(16) 0.34482(9) 0.0289(6) Uani 1 1 d . . . 
H3A H 0.3239 0.7112 0.3421 0.035 Uiso 1 1 calc R . . 
C4 C 0.0137(5) 0.61255(16) 0.32685(9) 0.0290(6) Uani 1 1 d . . . 
H4A H 0.0516 0.6019 0.2894 0.035 Uiso 1 1 calc R . . 
H4B H -0.1880 0.6102 0.3283 0.035 Uiso 1 1 calc R . . 
C16 C 0.6637(5) 0.53294(19) 0.18170(10) 0.0367(6) Uani 1 1 d . . . 
H16A H 0.7069 0.4697 0.1864 0.044 Uiso 1 1 calc R . . 
C17 C 0.4769(6) 0.5741(2) 0.21298(10) 0.0414(7) Uani 1 1 d . . . 
H17A H 0.3921 0.5384 0.2384 0.050 Uiso 1 1 calc R . . 
C10 C 1.3701(5) 0.44197(17) 0.03529(9) 0.0327(6) Uani 1 1 d . . . 
H10A H 1.2842 0.4024 0.0587 0.049 Uiso 1 1 calc R . . 
H21 H 0.224(8) 0.623(2) 0.5682(14) 0.093(13) Uiso 1 1 d . . . 
H20 H 0.039(8) 0.351(3) 0.2683(15) 0.113(13) Uiso 1 1 d . . . 
H0A H 0.274(7) 0.699(2) 0.2285(12) 0.078(10) Uiso 1 1 d . . . 
 
loop_ 
 _atom_site_aniso_label 
 _atom_site_aniso_U_11 
 _atom_site_aniso_U_22 
 _atom_site_aniso_U_33 
 _atom_site_aniso_U_23 
 _atom_site_aniso_U_13 
 _atom_site_aniso_U_12 
O4 0.0604(13) 0.0374(10) 0.0256(9) 0.0081(8) 0.0131(9) 0.0127(10) 
O5 0.0746(15) 0.0338(10) 0.0339(10) -0.0124(8) 0.0210(10) -0.0112(10) 
C14 0.0344(15) 0.0338(14) 0.0304(13) -0.0016(11) 0.0070(12) 0.0048(12) 
C12 0.0218(13) 0.0370(14) 0.0256(12) 0.0012(11) 0.0059(10) 0.0039(12) 
O3 0.0904(17) 0.0512(13) 0.0391(11) 0.0069(10) 0.0210(11) 0.0329(13) 
O2 0.0643(14) 0.0634(14) 0.0250(10) 0.0057(10) 0.0052(10) -0.0018(12) 
C13 0.0309(14) 0.0325(14) 0.0318(13) 0.0006(11) 0.0039(11) 0.0058(12) 
O6 0.0926(16) 0.0418(11) 0.0280(9) -0.0065(9) 0.0191(11) -0.0278(12) 
C15 0.0258(14) 0.0368(14) 0.0268(12) -0.0030(11) 0.0016(11) 0.0002(12) 
C1 0.0429(15) 0.0269(13) 0.0213(12) -0.0012(10) 0.0039(11) -0.0050(12) 
C9 0.0486(17) 0.0254(13) 0.0214(12) -0.0001(10) 0.0058(12) -0.0015(13) 
O1 0.0861(17) 0.0598(14) 0.0391(11) -0.0034(10) 0.0228(11) 0.0179(13) 
N 0.0354(13) 0.0439(14) 0.0327(12) -0.0092(11) 0.0094(10) 0.0027(11) 
C8 0.0453(16) 0.0221(12) 0.0268(12) 0.0005(10) 0.0074(12) -0.0020(12) 
C11 0.0350(15) 0.0319(14) 0.0345(13) 0.0044(11) 0.0087(12) 0.0067(12) 
C6 0.0460(16) 0.0234(12) 0.0228(12) 0.0011(10) 0.0043(11) -0.0027(12) 
C19 0.0378(16) 0.0372(15) 0.0399(15) -0.0015(12) 0.0128(13) -0.0031(13) 
C5 0.0357(14) 0.0235(12) 0.0241(12) -0.0022(10) 0.0039(11) -0.0017(11) 
C2 0.0511(17) 0.0251(13) 0.0263(12) -0.0043(10) 0.0046(12) -0.0051(13) 
C7 0.0513(17) 0.0269(13) 0.0251(13) -0.0037(11) 0.0045(13) -0.0106(13) 
C18 0.0417(17) 0.0360(15) 0.0442(15) -0.0030(13) 0.0097(14) 0.0022(13) 
C3 0.0368(15) 0.0256(13) 0.0246(12) -0.0002(10) 0.0039(11) -0.0048(12) 
C4 0.0371(15) 0.0299(13) 0.0206(11) -0.0020(10) 0.0055(11) -0.0015(12) 
C16 0.0420(16) 0.0355(14) 0.0342(14) 0.0046(12) 0.0121(13) 0.0084(13) 
C17 0.0457(17) 0.0483(17) 0.0316(14) 0.0033(13) 0.0109(13) 0.0054(15) 
C10 0.0320(15) 0.0350(14) 0.0327(13) 0.0074(11) 0.0107(12) 0.0020(12) 
 
_geom_special_details 
; 
 All esds (except the esd in the dihedral angle between two l.s. planes) 
 are estimated using the full covariance matrix.  The cell esds are taken 
 into account individually in the estimation of esds in distances, angles 
 and torsion angles; correlations between esds in cell parameters are only 
 used when they are defined by crystal symmetry.  An approximate (isotropic) 
 treatment of cell esds is used for estimating esds involving l.s. planes. 
; 
 
loop_ 
 _geom_bond_atom_site_label_1 
 _geom_bond_atom_site_label_2 
 _geom_bond_distance 
 _geom_bond_site_symmetry_2 
 _geom_bond_publ_flag 
O4 C8 1.304(3) . ? 
O5 C9 1.294(3) . ? 
C14 C13 1.330(3) . ? 
C14 C15 1.463(3) . ? 
C12 C10 1.396(3) . ? 
C12 C11 1.401(3) . ? 
C12 C13 1.468(3) . ? 
O3 C8 1.218(3) . ? 
O2 C7 1.326(3) . ? 
O6 C9 1.226(3) . ? 
C15 C19 1.401(3) . ? 
C15 C16 1.404(3) . ? 
C1 C7 1.516(3) . ? 
C1 C2 1.529(3) . ? 
C1 C6 1.540(3) . ? 
C9 C5 1.511(3) . ? 
O1 C7 1.204(3) . ? 
N C18 1.344(3) . ? 
N C17 1.344(3) . ? 
C8 C3 1.524(3) . ? 
C11 C10 1.385(3) 3_865 ? 
C6 C5 1.530(3) . ? 
C19 C18 1.372(3) . ? 
C5 C4 1.540(3) . ? 
C2 C3 1.529(3) . ? 
C3 C4 1.526(3) . ? 
C16 C17 1.367(3) . ? 
C10 C11 1.385(3) 3_865 ? 
 
loop_ 
 _geom_angle_atom_site_label_1 
 _geom_angle_atom_site_label_2 
 _geom_angle_atom_site_label_3 
 _geom_angle 
 _geom_angle_site_symmetry_1 
 _geom_angle_site_symmetry_3 
 _geom_angle_publ_flag 
C13 C14 C15 125.0(2) . . ? 
C10 C12 C11 117.8(2) . . ? 
C10 C12 C13 123.2(2) . . ? 
C11 C12 C13 118.9(2) . . ? 
C14 C13 C12 126.9(2) . . ? 
C19 C15 C16 117.0(2) . . ? 
C19 C15 C14 123.3(2) . . ? 
C16 C15 C14 119.7(2) . . ? 
C7 C1 C2 111.0(2) . . ? 
C7 C1 C6 108.17(19) . . ? 
C2 C1 C6 111.93(19) . . ? 
O6 C9 O5 123.1(2) . . ? 
O6 C9 C5 123.6(2) . . ? 
O5 C9 C5 113.2(2) . . ? 
C18 N C17 120.7(2) . . ? 
O3 C8 O4 123.8(2) . . ? 
O3 C8 C3 121.8(2) . . ? 
O4 C8 C3 114.4(2) . . ? 
C10 C11 C12 121.6(2) 3_865 . ? 
C5 C6 C1 111.77(18) . . ? 
C18 C19 C15 120.1(2) . . ? 
C9 C5 C6 114.34(19) . . ? 
C9 C5 C4 108.55(19) . . ? 
C6 C5 C4 110.14(18) . . ? 
C3 C2 C1 112.05(19) . . ? 
O1 C7 O2 123.0(2) . . ? 
O1 C7 C1 124.6(3) . . ? 
O2 C7 C1 112.4(2) . . ? 
N C18 C19 121.0(3) . . ? 
C8 C3 C4 109.96(19) . . ? 
C8 C3 C2 112.6(2) . . ? 
C4 C3 C2 110.12(18) . . ? 
C3 C4 C5 111.94(19) . . ? 
C17 C16 C15 120.7(2) . . ? 
N C17 C16 120.5(3) . . ? 
C11 C10 C12 120.6(2) 3_865 . ? 
 
_diffrn_measured_fraction_theta_max    0.994 
_diffrn_reflns_theta_full              27.43 
_diffrn_measured_fraction_theta_full   0.994 
_refine_diff_density_max    0.207 
_refine_diff_density_min   -0.184 
_refine_diff_density_rms    0.048 

#===END
